# Supplementary material
Source: Royal Society of Chemistry journal article supplement (doi:10.1039/d6mh00586a)
Supplement: d6mh00586a1.pdf [file d6mh00586a1.pdf]

1 **Supplementary Information**

2  
3 **Synergistic Protein-reinforced DNA Hydrogels with Tunable Biomechanics for**  
4 **Mechanoresponsive Drug Release**

5 *Kanchan Yadav*<sup>†a</sup>, *Iksoo Jang*<sup>†a</sup>, *Yoonbin Ji*<sup>a</sup>, *Taehyeon Kim*<sup>a</sup>, *Peter Chang-Whan Lee*<sup>\*cd</sup>, *Jong Bum*  
6 *Lee*<sup>\*ab</sup>

7  
8 <sup>a</sup>Chemical Engineering Department, University of Seoul, Seoul-02504, Republic of Korea

9 <sup>b</sup>Center for Innovative Chemical Processes, Institute of Engineering, University of Seoul, 163  
10 Seoulsiripdaero, Dongdaemun-gu, Seoul 02504, Republic of Korea.

11 <sup>c</sup>Department of Biochemistry & Molecular Biology, College of Medicine, University of Ulsan,  
12 Asan Medical Center, Seoul, 05505, Republic of Korea

13 <sup>d</sup>Lung Cancer Research Center, Asan Medical Center, University of Ulsan College of Medicine,  
14 Seoul, 05505, Republic of Korea

15 \* Corresponding author:

16 Correspondence to Jong Bum Lee, Peter Chang-Whan Lee

17 \* Peter C. W. Lee, PhD, Department of Biochemistry & Molecular Biology, University of Ulsan  
18 College of Medicine, Asan Medical Center, Seoul, 05505, Republic of Korea. E-mail:  
19 pclee@amc.seoul.kr

20 \* Jong Bum Lee, PhD, Department of Chemical Engineering, University of Seoul, 163  
21 Seoulsiripdaero, Dongdaemun-gu, Seoul, 02504, Republic of Korea. E-mail: [jblee@uos.ac.kr](mailto:jblee@uos.ac.kr)

22 Email: [Kanchany10038@gmail.com](mailto:Kanchany10038@gmail.com), [iksoojang.uos@gmail.com](mailto:iksoojang.uos@gmail.com), [Yoonbinji.uos](mailto:Yoonbinji.uos@gmail.com)  
23 [@gmail.com](mailto:@gmail.com), [thkimuosuos@gmail.com](mailto:thkimuosuos@gmail.com)

24  
25 *†: equal contribution*

26  
27  
28  
29  
30  
31  
32  
33

1 **Supplementary Tables and Figures**

2  
3 Table S1. List of DNA sequences and multiprimer sequences used to form BRIDGe.

4 Table S2. List of various linear templates of DNA to form BRIDGe.

5 Fig. S1–S8. Characterization for synthesis and mechanism of BSA-stapled RCA-derived  
6 interwoven DNA gels (BRIDGe).

7 Fig. S9–S15. Characterization of precisely tunable physical and mechanical properties of  
8 BRIDGe with increasing concentration of stapling.

9 Fig. S16–S25. Characterization of morphology and enhanced stability of the synthesized stapled  
10 hydrogels.

11  
12  
13  
14  
15  
16  
17  
18  
19  
20  
21  
22  
23  
24  
25  
26

1 **Table S1.** List of DNA and multiprimer sequences used to form BRIDGE

2

| Name                       | Sequence (5'-3')                                                                                                                                 |
|----------------------------|--------------------------------------------------------------------------------------------------------------------------------------------------|
| Linear DNA                 | 5'-Phosphate-TCG TTT GAT GTT CCT AAC GTA CCA ACG CAC<br>ACG CAG TAT TAT GGA CTG GTA AAA GCT TTC CGA GGT AGC<br>CTG GAG CAT AGA GGC ATT GGC TG-3' |
| Primer for circular<br>DNA | 5'-TAG GAA CAT CAA ACG ACA GCC A-3'                                                                                                              |
| Multiprimer1               | 5'-ACG CAG TAT TAT GGA CTG-3'                                                                                                                    |
| Multiprimer2               | 5'-TGG TAC GTT AGG AAC ATC-3'                                                                                                                    |

3

4

5

6

7

8

9

10

11

12

13

14

15

16

17

18

19

20

21

22

23

24

25

1 **Table S2.** List of various linear templates of DNA to justify the applicabilty of protein  
2 reinformacemnt process to form BRIDGE

3

| <b>Name</b>          | <b>Sequence (5'-3')</b>                                                                                                                             |
|----------------------|-----------------------------------------------------------------------------------------------------------------------------------------------------|
| BRIDGE<br>Linear DNA | 5'-Phosphate-TCG TTT GAT GTT CCT AAC GTA CCA ACG CAC ACG CAG TAT<br>GGA CTG GTA AAA GCT TTC CGA GGT AGC CTG GAG CAT AGA GGC ATT G<br>G-3'           |
| CpG linear<br>DNA    | 5'-Phosphate –TAG TTT CAT GTT TGG CTA CTC TAC TTA GAT TAA CGT CAG<br>GAA CGT CAT GGA CTG AGT ACT TAG ATT AAC GTC AGG AAC GTC ATG<br>GAG GAA TG-3'   |
| IBA linear<br>DNA    | 5'-Phosphate –AGG GAT ATG CCT CTA ATA AAT ATT AAC CAG AAG ACA C<br>CC TAC CAA CCC CCC CCA CCA CCA TAA GAA GTT GGT ACG TTA ATA CG<br>A CTC ACT AT-3' |

4

5

6

7

8

9

10

11

12

13

14

15

16

17

18

19

20

21

22

23

24

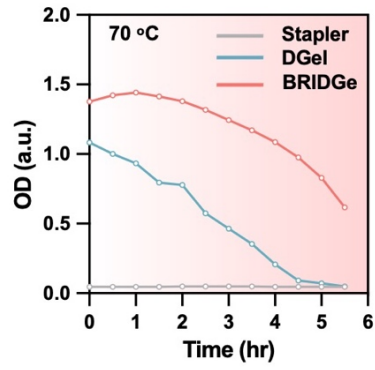

1  
2  
3  
4  
5  
6  
7  
8  
9  
10  
11  
12  
13  
14  
15  
16  
17  
18  
19  
20  
21  
22  
23  
24  
25

**Figure S1.** Comparative changes in optical density of BRIDGE, DGel, and stapler (BSA) during gelation under prolonged incubation at 70 °C.

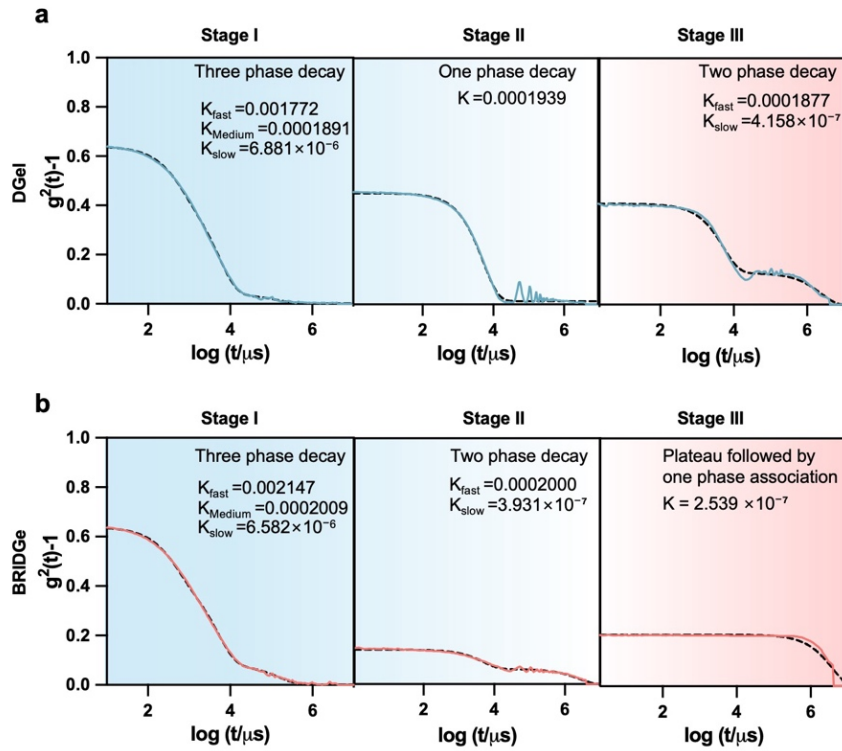

1  
2  
3 **Figure S2.** DLS autocorrelation functions of (a) DGel and (b) BRIDGE hydrogels measured at phase  
4 transition points: pregel state I \_ 6 h, soft gel state II \_ 20 h, after stapling process state III \_ 21 h.

5  
6  
7  
8  
9  
10  
11  
12  
13  
14  
15  
16  
17  
18  
19

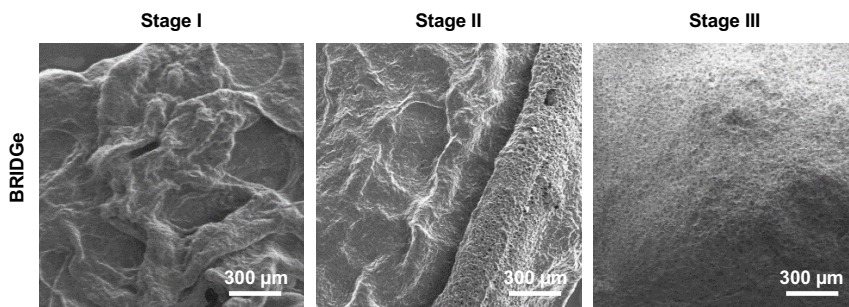

1  
2  
3  
4  
5  
6  
7  
8  
9  
10  
11  
12  
13  
14  
15  
16  
17  
18  
19  
20  
21  
22  
23  
24  
25

**Figure S3.** SEM images of BRIDGE at phase transition points: pregel state I \_ 6 h, soft gel state II \_ 20 h, after stapling process state III \_ 21 h.

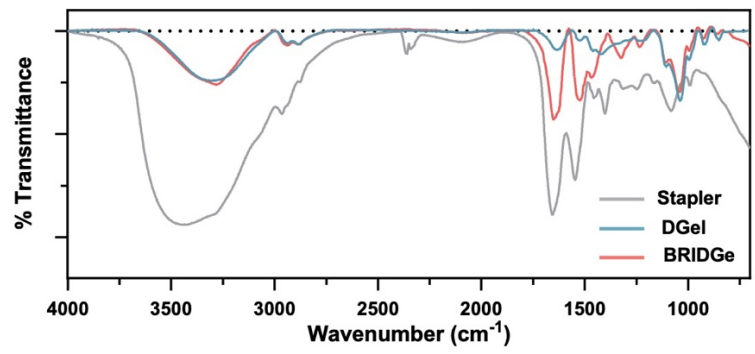

1  
2  
3  
4  
5  
6  
7  
8  
9  
10  
11  
12  
13  
14  
15  
16  
17  
18  
19

**Figure S4.** Comparative full-scan FTIR spectra of BRIDGE, DGel, and stapler (BSA protein)

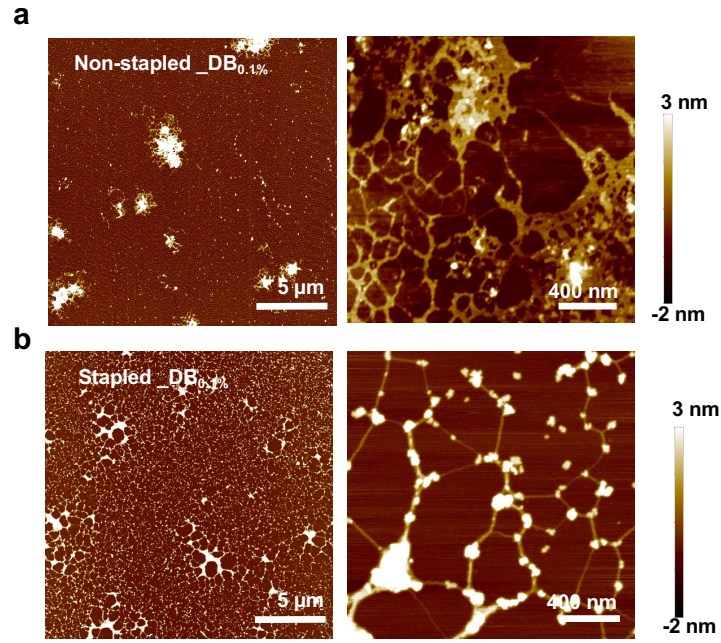

1  
2  
3  
4  
5  
6  
7  
8  
9  
10  
11  
12  
13  
14  
15  
16  
17  
18  
19  
20

**Figure S5.** AFM images of (a) non-stapled and (b) stapled hydrogel (heating at 70 °C \_ 1 h) at an early stage of RCA (4 h) with a lower concentration of the BSA protein (1 mg/ml).

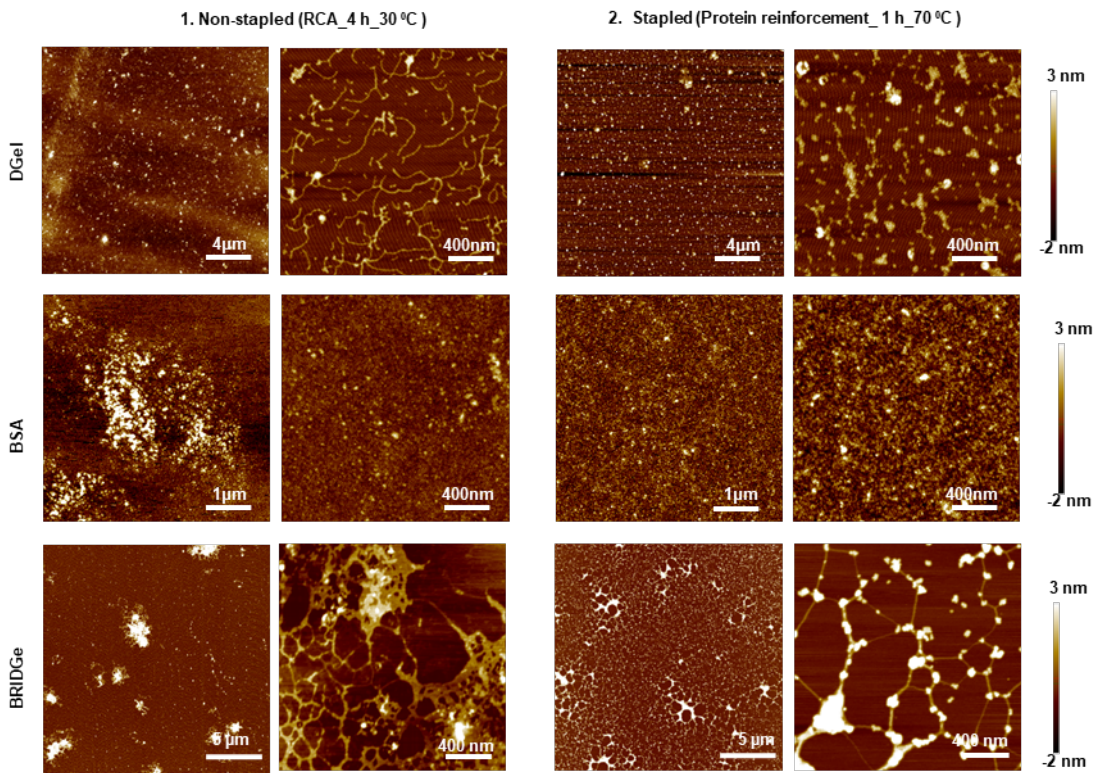

**Figure S6.** AFM images of Dgel, BSA and BRIDGe with and without stapling process (heating at 70 °C) at early stage of RCA (4 h) and lower concentration of the BSA (1mg/ml).

1  
2  
3  
4  
5  
6  
7  
8  
9  
10  
11  
12  
13  
14  
15  
16  
17  
18  
19

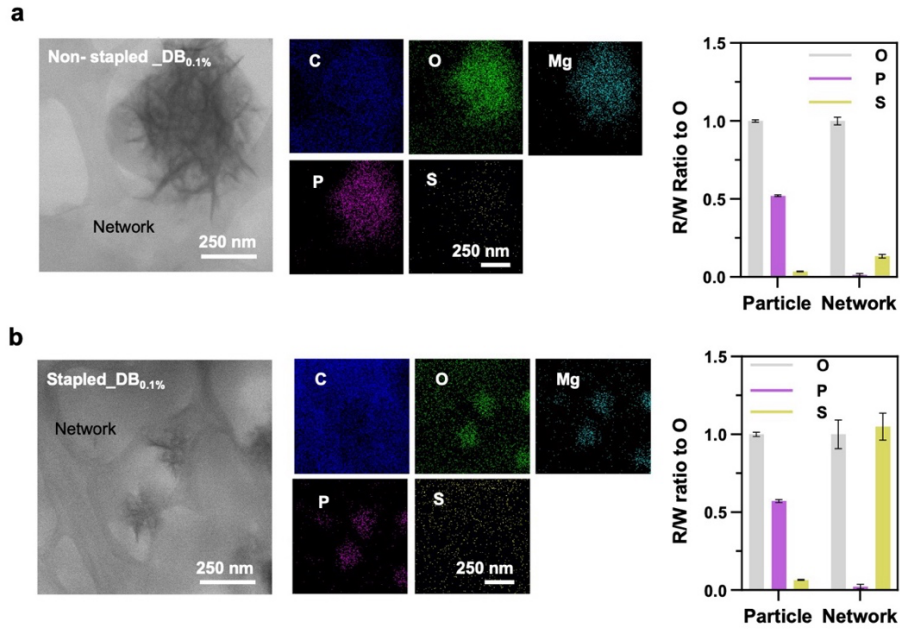

1  
2  
3 **Figure S7.** TEM images of (a) non-stapled and (b) stapled hydrogels, with EDS elemental mapping  
4 of carbon (C; blue), oxygen (O; green), magnesium (Mg; cyan), phosphorus (P; violet), and sulfur  
5 (S; yellow). The attached bar graphs (top: non-stapled hydrogel, bottom: stapled hydrogel) show the  
6 relative weight ratio of phosphorus and sulfur at particle and connecting network sites compared to  
7 oxygen.

8

9

10

11

12

13

14

15

16

17

18

19

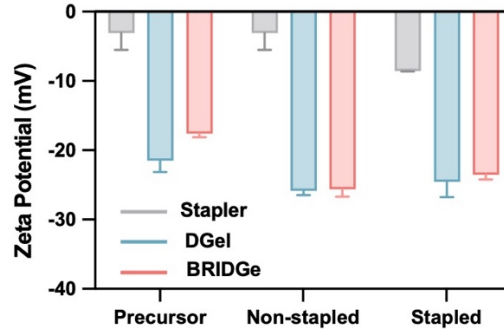

1  
2 **Figure S8.** Zeta potential measurements were performed for the precursor solution, DGel, and  
3 BRIDGe formulations with and without the stapling process (heating at 70 °C), under conditions  
4 corresponding to the early stage of RCA reaction (4 h) and a lower BSA concentration (1 mg/mL).

5  
6  
7  
8  
9  
10  
11  
12  
13  
14  
15  
16  
17  
18  
19  
20  
21  
22  
23  
24  
25  
26

1

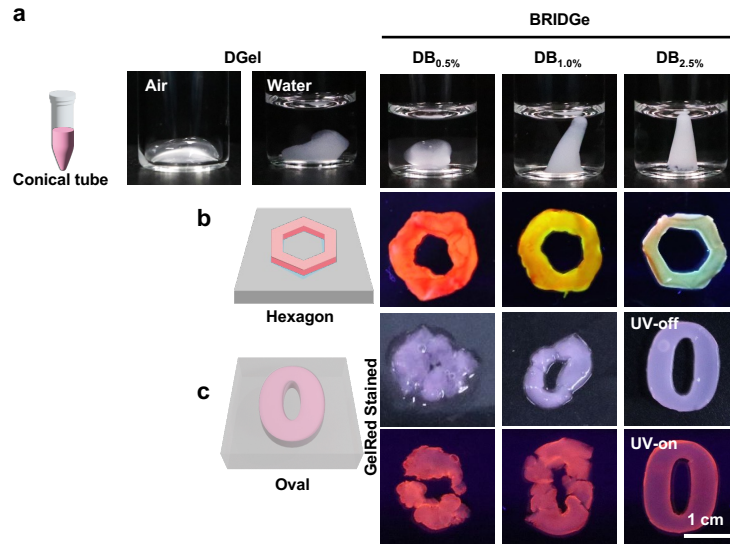

2

3

4 **Figure S9.** Digital images of DGel and stapled hydrogels (DB<sub>0.5%</sub>, DB<sub>1.0%</sub>, and DB<sub>2.5%</sub>) in various  
5 molds (a. conical tube, b. Hexagon shape PDMS mold, c. oval-shaped PDMS mold) to demonstrate  
6 the versatile applicability of the hydrogels for various biomedical implants. Additionally, GelRed-  
7 stained hydrogel images under UV light show the homogeneous integration of DNA in the stapled  
8 hydrogel network.

9

10

11

12

13

14

15

16

17

18

19

20

21

22

23

1

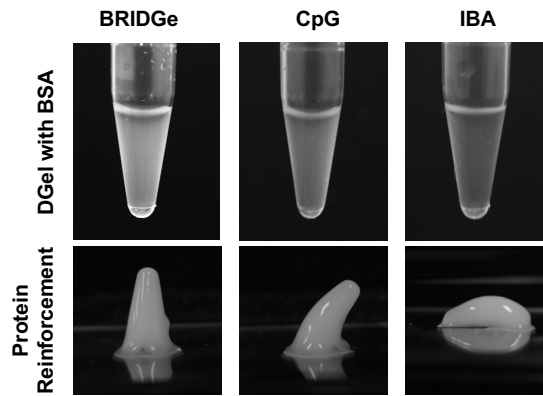

2

3 **Figure S10.** Digital images of the protein-reinforced hydrogels prepared with various DNA  
4 sequences demonstrate the versatility of the two-step gelation process.

5

6

7

8

9

10

11

12

13

14

15

16

17

18

19

20

21

22

23

24

1

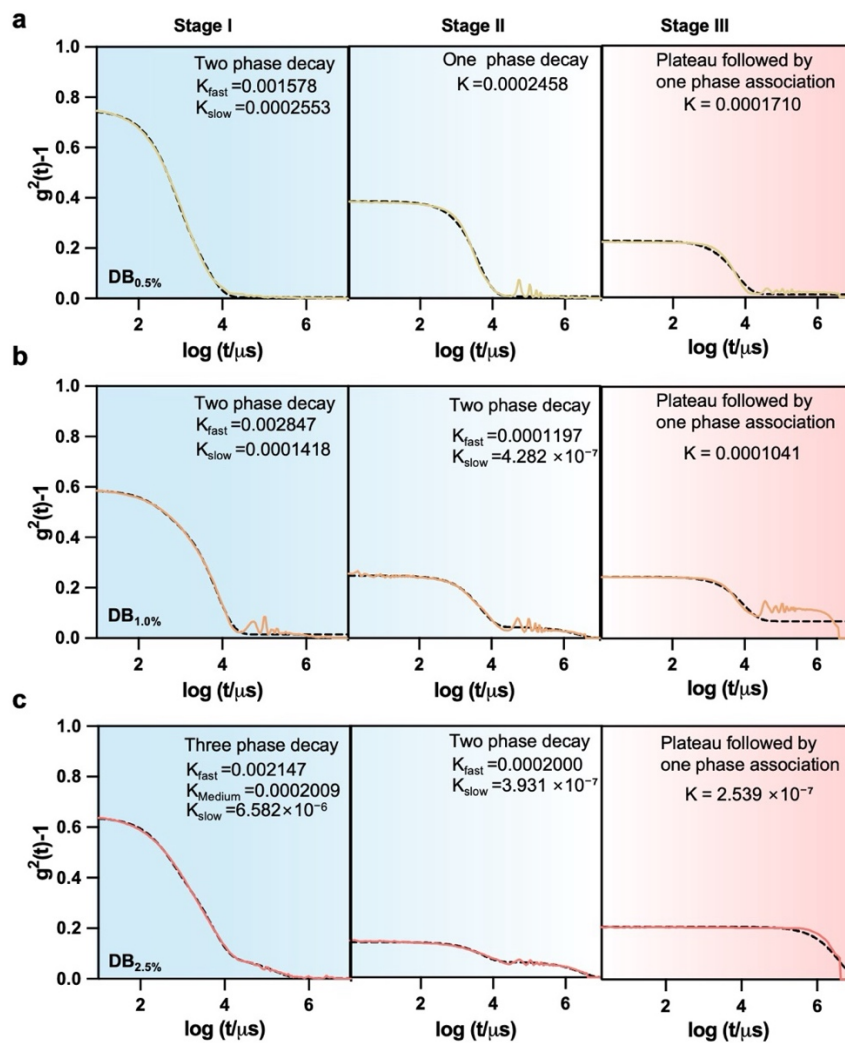

2

3

4 **Figure S11.** Comparative DLS autocorrelation function of (a) DB<sub>0.5%</sub>, (b) DB<sub>1.0%</sub>, and (c) DB<sub>2.5%</sub>  
5 hydrogels at phase transition points: pregel: state I \_ 6 h, soft gel: state II \_ 20 h, after stapling  
6 process: state III \_ 21 h.

7

8

9

10

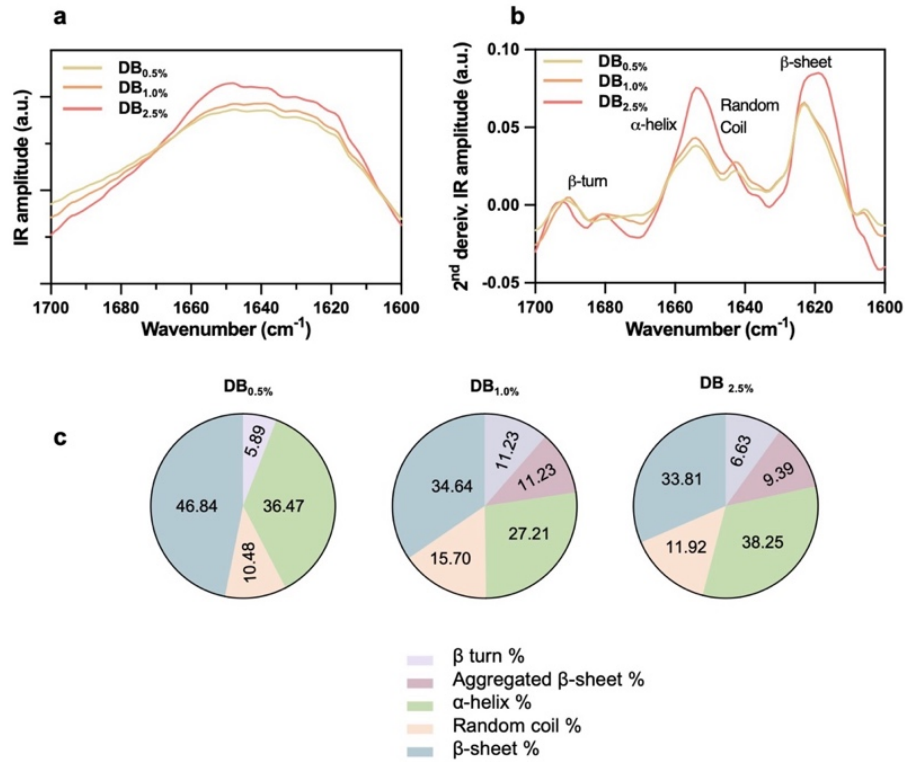

1  
2  
3 **Figure S12.** (a) FTIR spectra of stapled hydrogels in the amide I region (1700–1600 cm<sup>-1</sup>). (b)  
4 Second-derivative IR analysis to understand the transformation of secondary structures with  
5 increasing percentage of stapling. (c) Pie charts showing the percentage of each secondary structure  
6 in stapled hydrogels with increasing percentage of BSA protein.

7  
8  
9  
10  
11  
12  
13  
14  
15  
16  
17

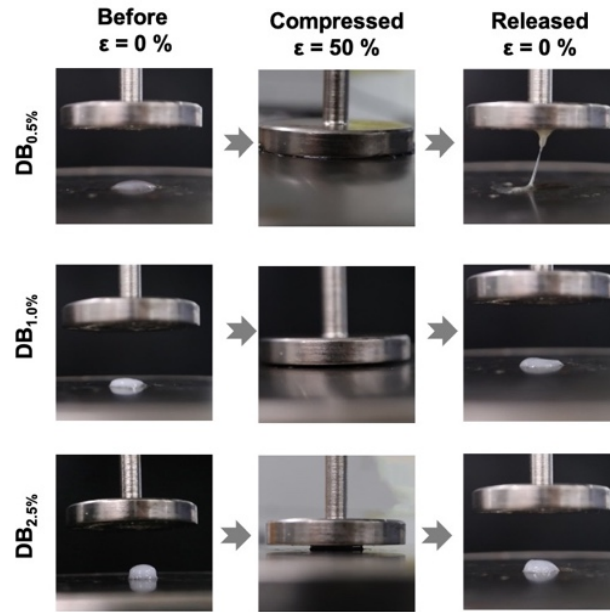

1  
2  
3  
4  
5  
6  
7  
8  
9  
10  
11  
12  
13  
14  
15  
16  
17  
18  
19  
20  
21

**Figure S13.** Stapled hydrogels (DB<sub>0.5%</sub>, DB<sub>1.0%</sub>, and DB<sub>2.5%</sub>) under 50% compressive strain.

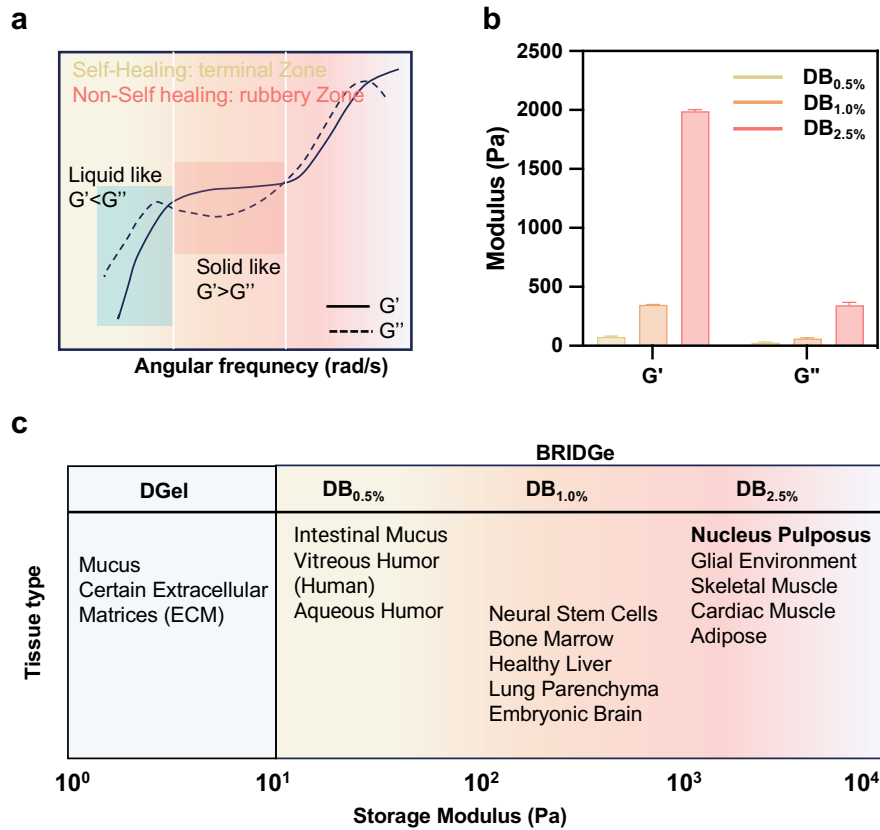

1  
2  
3 **Figure S14.** (a) Model spectra for angular-frequency-dependent physical states of hydrogel. (b)  
4 Comparative analysis of storage modulus ( $G'$ ) and loss modulus ( $G''$ ) of hydrogels at a frequency  
5 of 1 rad/s. (c) Coherence between tunable BRIDGE hydrogels and native soft tissues based on  
6 storage modulus. The stiffness range of BRIDGE hydrogels (DB<sub>0.5%</sub>, DB<sub>1.0%</sub>, DB<sub>2.5%</sub>) spans  
7 approximately 1–10 kPa, aligning with the mechanical properties of nucleus pulposus tissue and  
8 other biological tissues.

9  
10  
11  
12  
13  
14  
15  
16  
17  
18  
19

1

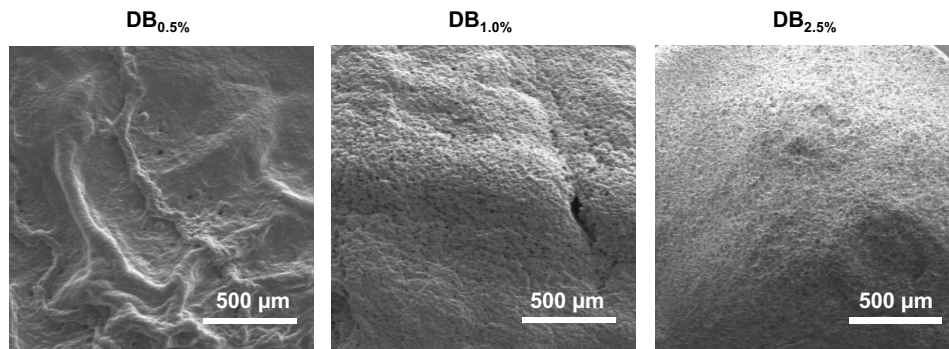

2

3

4

**Figure S15.** SEM images of stapled hydrogels  $DB_{0.5\%}$ ,  $DB_{1.0\%}$ , and  $DB_{2.5\%}$ .

5

6

7

8

9

10

11

12

13

14

15

16

17

18

19

20

21

22

23

24

25

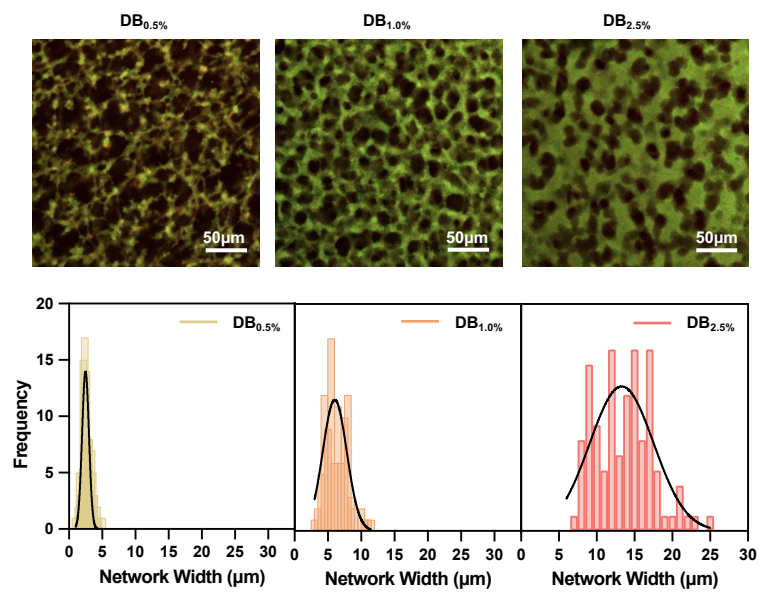

1

2

3 **Figure S16.** CLSM images of stapled hydrogels (DB<sub>0.5%</sub>, DB<sub>1.0%</sub>, and DB<sub>2.5%</sub>) and respective  
 4 network width distribution histograms.

5

6

7

8

9

10

11

12

13

14

15

16

17

18

19

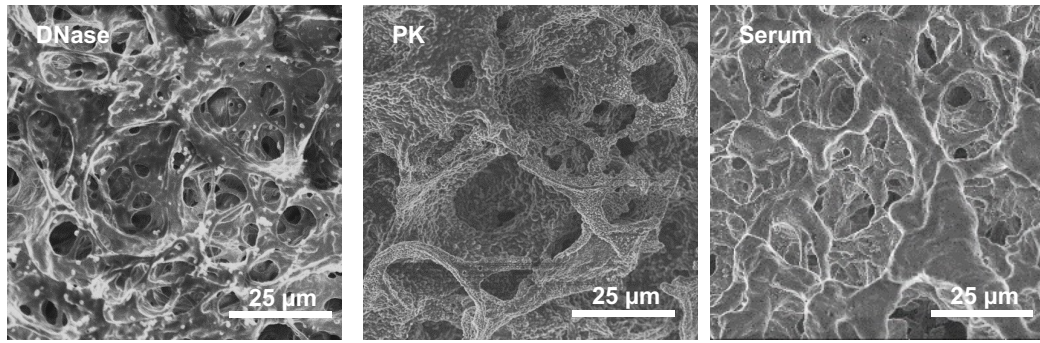

1  
2  
3  
4  
5  
6  
7  
8  
9  
10  
11  
12  
13  
14  
15  
16  
17  
18  
19  
20  
21

**Figure S17.** Physical states of DB<sub>2.5%</sub> hydrogel in various enzymatic conditions: DNase, Proteinase K (PK), and serum.

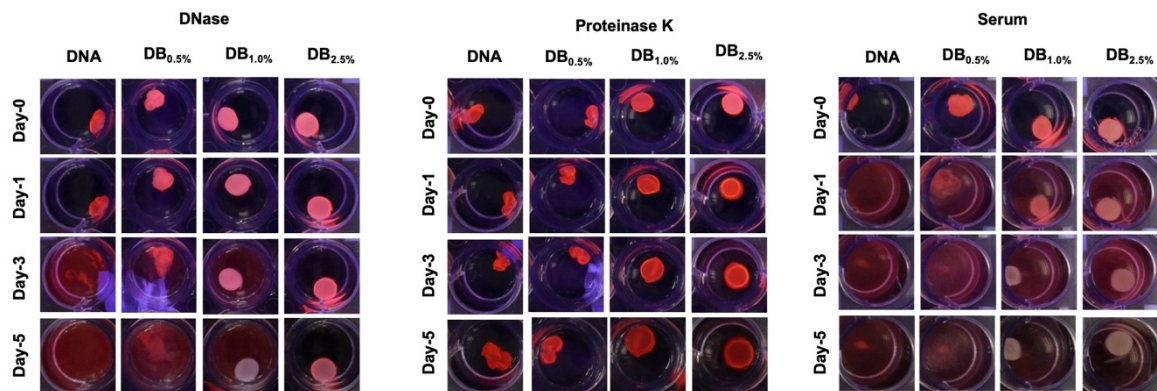

1  
2  
3 **Figure S18.** Stability analysis of stapled hydrogels in various enzymatic conditions over a period  
4 of 5 days.

5  
6  
7  
8  
9  
10  
11  
12  
13  
14  
15  
16  
17  
18  
19  
20  
21  
22  
23  
24  
25

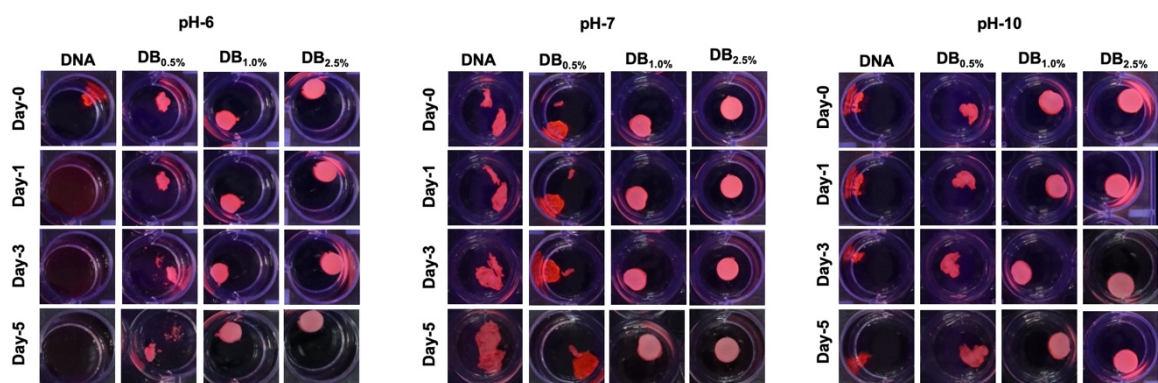

**Figure S19.** Stability analysis of stapled hydrogels in various pH conditions over a period of 5 days.

1  
2  
3  
4  
5  
6  
7  
8  
9  
10  
11  
12  
13  
14  
15  
16  
17  
18  
19  
20  
21  
22  
23  
24  
25

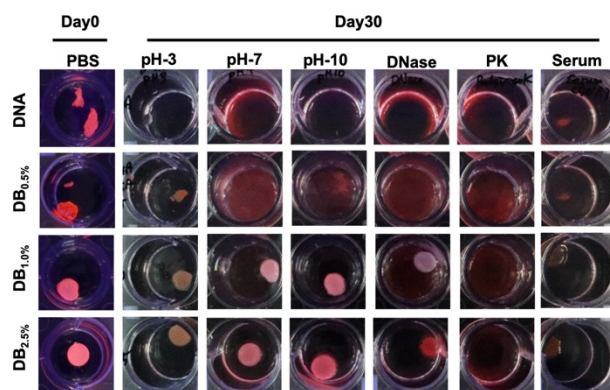

1

2

3 **Figure S20.** Comparative analysis of stapled hydrogels in various enzymatic and pH conditions  
 4 over a period of 30 days.

5

6

7

8

9

10

11

12

13

14

15

16

17

18

19

20

21

22

23

24

25

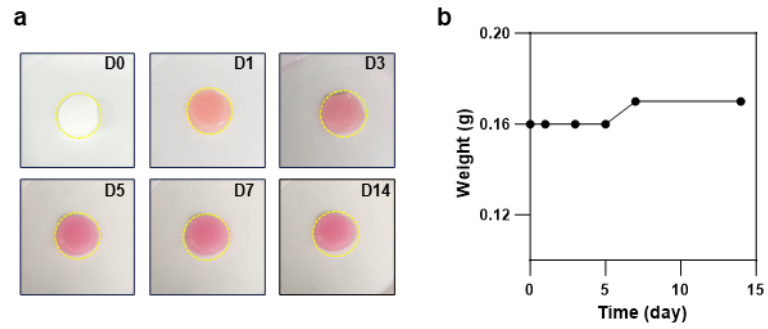

1  
 2 **Figure S21.** Stability analysis of BRIDGE in high concentration of pro-inflammatory cytokines  
 3 serum. (a) Digital image of BRIDGE during a 14-day incubation period (D0-D14) in serum  
 4 containing pro-inflammatory cytokines. (b) Time dependent wight profile of BRIDGE over 14  
 5 days.

6  
 7  
 8  
 9  
 10  
 11  
 12  
 13  
 14  
 15  
 16  
 17  
 18  
 19  
 20  
 21  
 22  
 23  
 24  
 25  
 26

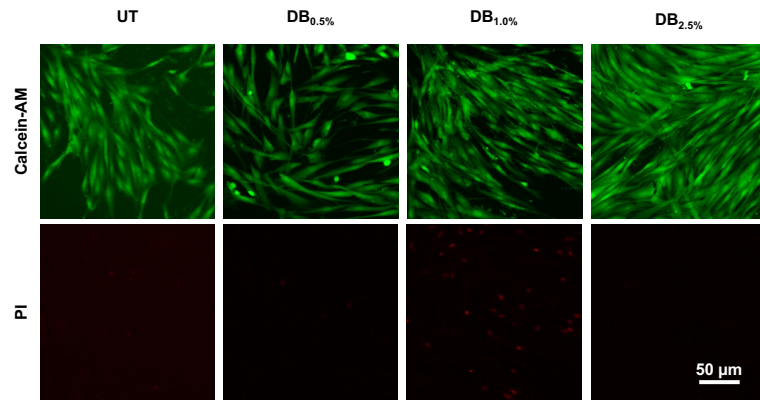

1  
2  
3  
4  
5  
6  
7  
8  
9  
10  
11  
12  
13  
14  
15  
16  
17  
18  
19  
20  
21  
22  
23  
24

**Figure S22.** Fluorescence image of live and dead cells: living cells show green fluorescence (Calcein-AM), and dead cells emit red fluorescence from propidium iodide (PI).

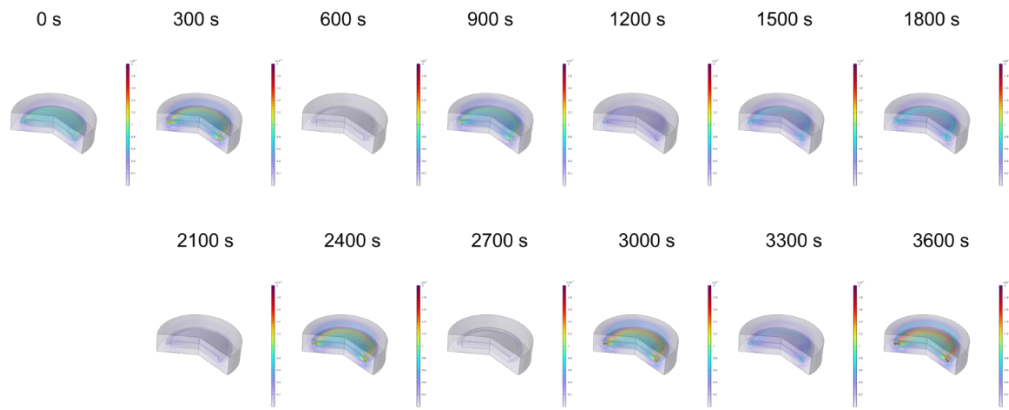

1  
2 **Figure S23.** COMSOL finite element analysis of the hydrogel under repetitive compressive  
3 loading. Time-lapse simulation profiles tracking the spatial distribution of internal von Mises  
4 stress within the DB2.5% hydrogel disk during continuous cyclic compressive loading for 3600 s  
5 (1 h). The color-coded scale indicates the magnitude and redistribution of mechanical stress.  
6

1

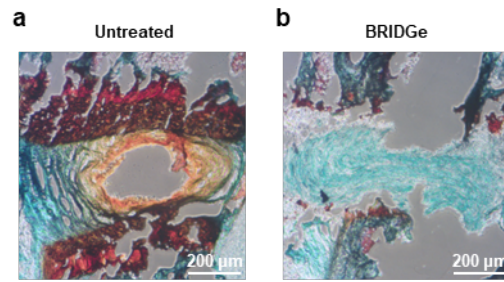

2

3 **Figure S24.** Ex-vivo structural stability and interface conformity of the BRIDGe . Safranin-O /  
4 Fast Green staining of mouse spines at Day 5 post-surgery in organ culture. (a) Intact normal  
5 control (UT) showing a well-organized, GAG-rich disc matrix (red). (b) BRIDGe group 5 days  
6 post-discectomy.

7

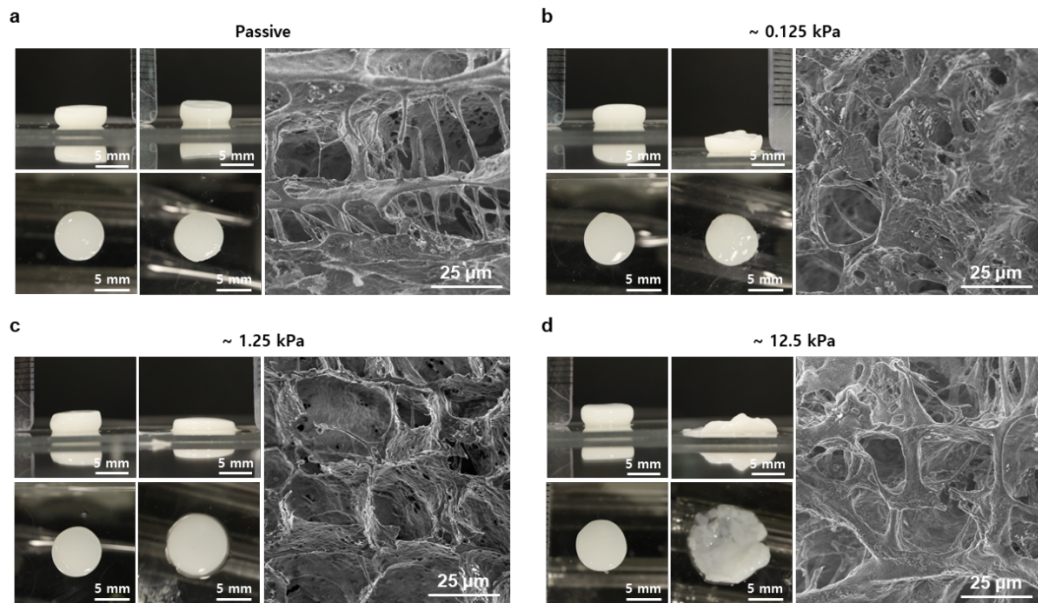

1  
2 **Figure S25.** Digital images (top and side views) and scanning electron microscopy (SEM) images  
3 of the hydrogels after continuous application of mechanical forces for 1 h: (A) no stimulus, (B)  
4 0.125 kPa, (C) 1.25 kPa, and (D) 12.5 kPa. Scale bars represent 5 mm for digital images and 25  $\mu\text{m}$   
5 for SEM images.
